# Supplementary material
Source: publisher figshare collection journal article supplement (https://aacr.figshare.com/ndownloader/files/43416684)
Supplement: Supplementary file 1 [file 43416684]

**Supplementary Tables**

**Supplementary Table 1. Primer information for RT-PCR analysis.**


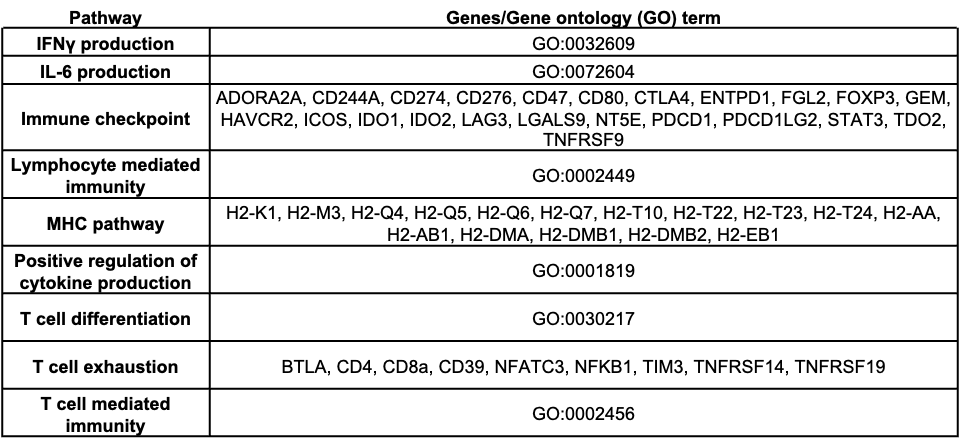


**Supplementary Table 2. Genes and gene ontology (GO) terms utilized for immune pathway analysis of RNA sequencing data.**


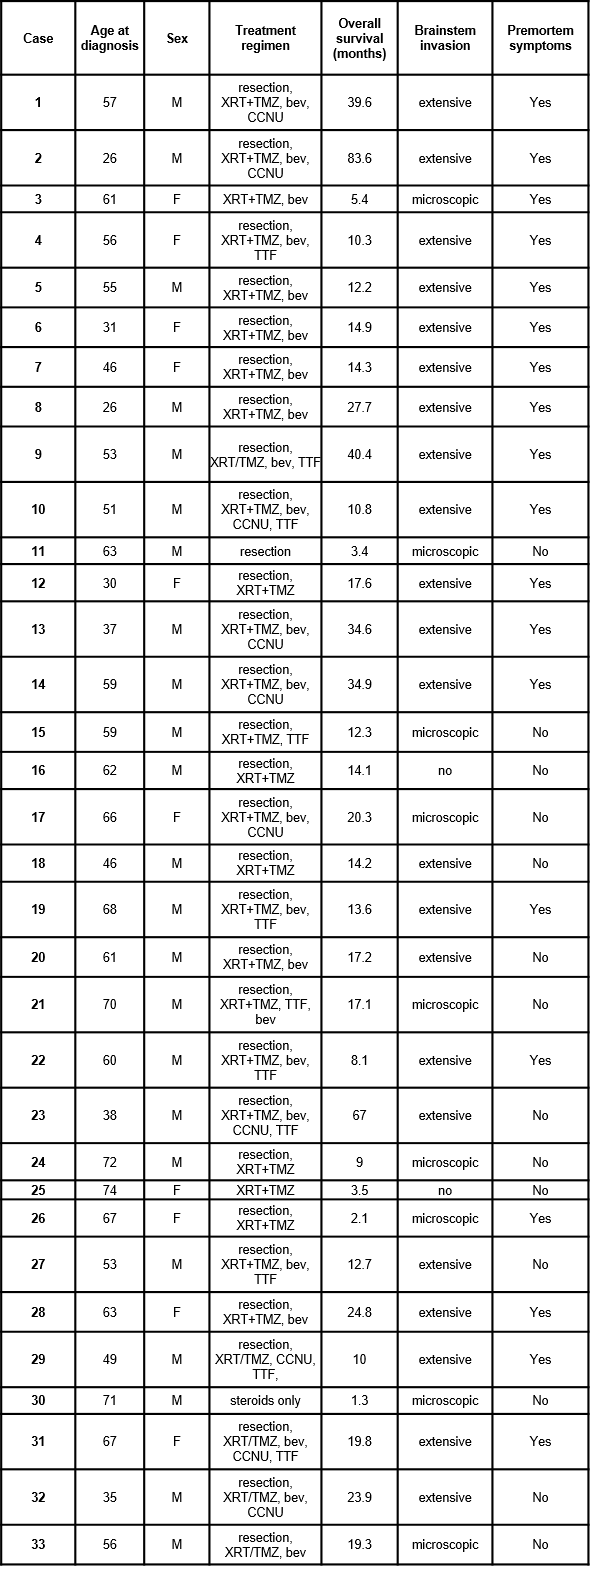


**Supplementary Table 3. Glioblastoma patient age and their association with levels of tumor cell infiltration in the brain stem.36**
